# Supplementary material for: Effect of Continuous Positive Airway Pressure on Lipid Profiles in Obstructive Sleep Apnea: A Meta-Analysis
Source: MDPI journal article supplement (doi:10.3390/jcm11030596), 2022-01-25
Supplement: s1 [file s1]

**Supplementary Text: The unit conversion formulas of each lipid profile**

Total cholesterol, high-density lipoprotein, low-density lipoprotein:  $1 \text{ mmol/l} = 38.7 \text{ mg/dl}$

Triglyceride:  $1 \text{ mmol/l} = 88.6 \text{ mg/dl}$

**Figure S1. Funnel plots of lipid profiles**

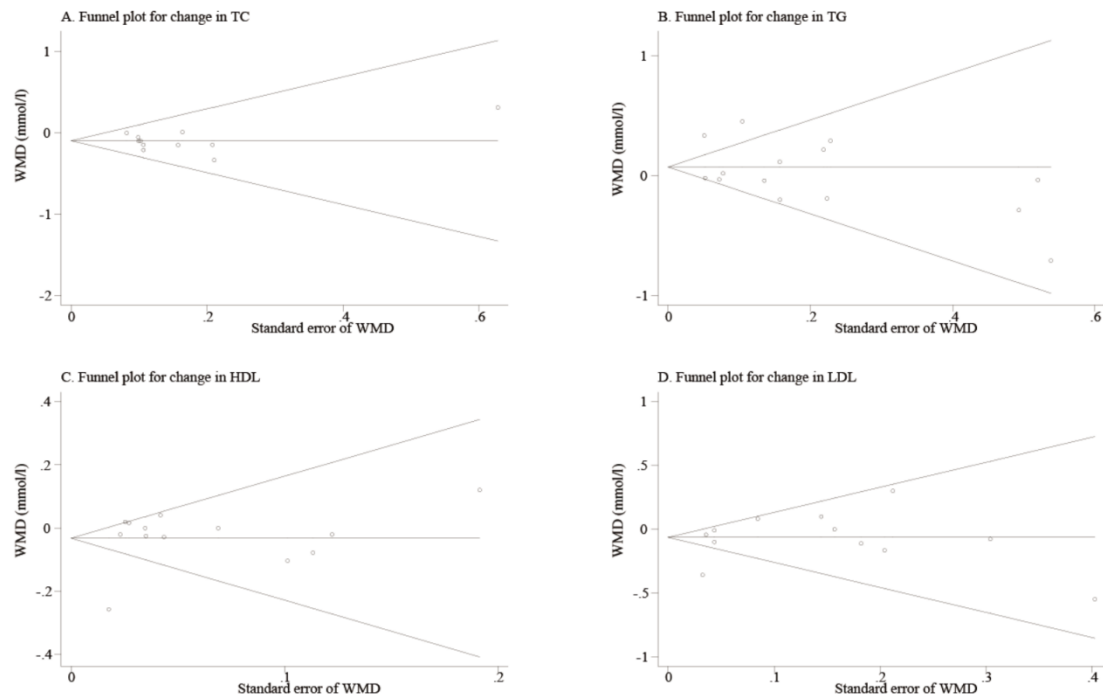

The funnel plots show no obvious asymmetry, suggesting low risk of publication bias.

HDL=high-density lipoprotein, LDL=low-density lipoprotein, TC=total cholesterol,

TG=triglyceride, WMD=weighted mean difference

**Figure S2. Funnel plots after trim and fill for total cholesterol**

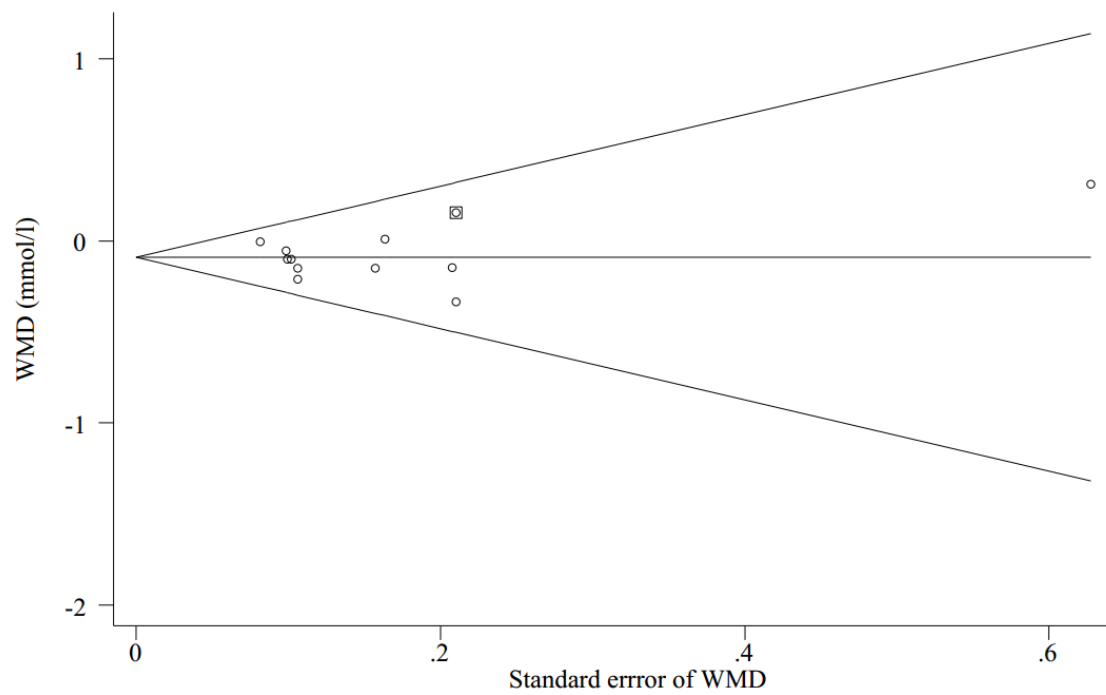

TC=total cholesterol, WMD=weighted mean difference

**Table S1. Search strategies****1. Search strategies for PubMed/Medline**

|     | Query                                                                                                                                                                                                                                          | Hits    |
|-----|------------------------------------------------------------------------------------------------------------------------------------------------------------------------------------------------------------------------------------------------|---------|
| #1  | sleep apnea, obstructive[MeSH Terms] OR sleep apnea syndrome[MeSH Terms]                                                                                                                                                                       | 38601   |
|     | SDB[Text Word] OR OSA[Text Word] OR OSAS[Text Word] OR SAHS[Text Word] OR SAS[Text Word] OR OSAHS[Text Word] OR                                                                                                                                | 49910   |
| #2  | obstructive sleep apnea[Text Word] OR sleep disorder breathing[Text Word] OR obstructive sleep apnoea[Text Word] OR sleep apnea syndrome[Text Word] OR sleep apnoea syndrome[Text Word]                                                        |         |
| #3  | #1 or #2                                                                                                                                                                                                                                       | 61715   |
|     | continuous positive airway pressure[MeSH Terms] OR positive pressure ventilation[MeSH Terms] OR Noninvasive Ventilation[MeSH Terms] OR positive pressure respiration[MeSH Terms]                                                               | 29461   |
| #4  | PAP[Text Word] OR positive airway pressure[Text Word] OR CPAP[Text Word] OR continuous positive airway pressure[Text Word] OR NPPV[Text Word] OR positive pressure ventilation[Text Word] OR positive pressure respiration[Text Word]          | 56139   |
| #5  |                                                                                                                                                                                                                                                |         |
| #6  | #4 or #5                                                                                                                                                                                                                                       | 58420   |
|     | (randomized controlled trial [pt] OR controlled clinical trial [pt] OR randomized [tiab] OR randomised [tiab] OR placebo [tiab] OR clinical trials as topic [mesh: noexp] OR randomly [tiab] OR trial [ti]) NOT (animals [mh] NOT humans [mh]) | 1398222 |
| #7  |                                                                                                                                                                                                                                                |         |
| #8  | review[Publication Type] OR "meta analysis"[Publication Type]                                                                                                                                                                                  | 2944182 |
| #9  | #7 not #8                                                                                                                                                                                                                                      | 1158596 |
| #10 | #3 and #6 and #9 Filters: Publication date to 2021/07/01                                                                                                                                                                                       | 1393    |

## 2. Search strategies for Embase

|    | Query                                                                                                                                                                                                                                                                                                                                                   | Hits    |
|----|---------------------------------------------------------------------------------------------------------------------------------------------------------------------------------------------------------------------------------------------------------------------------------------------------------------------------------------------------------|---------|
| #1 | 'sleep disordered breathing'/exp OR 'sdb':ti,ab,kw OR 'osa':ti,ab,kw<br>OR 'osas':ti,ab,kw OR 'sahs':ti,ab,kw OR 'sas':ti,ab,kw OR<br>'osahs':ti,ab,kw OR 'obstructive sleep apnea':ti,ab,kw OR 'sleep<br>disorder breathing':ti,ab,kw OR 'obstructive sleep apnoea':ti,ab,kw OR<br>'sleep apnea syndrome':ti,ab,kw OR 'sleep apnoea syndrome':ti,ab,kw | 181069  |
| #2 | 'positive end expiratory pressure'/exp OR 'noninvasive ventilation'/exp<br>OR 'pap':ti,ab,kw OR 'positive airway pressure':ti,ab,kw OR<br>'cpap':ti,ab,kw OR 'continuous positive airway pressure':ti,ab,kw OR<br>'positive pressure ventilation':ti,ab,kw OR 'nppv':ti,ab,kw OR 'positive<br>pressure respiration':ti,ab,kw                            | 109930  |
| #3 | ('randomized controlled trial'/exp OR 'randomized':ti,ab,kw OR<br>'placebo':ti,ab,kw OR 'randomly':ti,ab,kw OR 'randomised':ti,ab,kw)<br>NOT 'review':it NOT 'meta analysis'/exp                                                                                                                                                                        | 1401269 |
| #4 | #1 AND #2 AND #3 AND [1-1-0001]/sd NOT [1-7-2021]/sd                                                                                                                                                                                                                                                                                                    | 2447    |

### 3. Search strategies for Cochrane Central Register

|     | Search                                                                                                                                                                  | Hits    |
|-----|-------------------------------------------------------------------------------------------------------------------------------------------------------------------------|---------|
| #1  | MeSH descriptor: [Sleep Apnea, Obstructive] explode all trees                                                                                                           | 2092    |
| #2  | MeSH descriptor: [Sleep Apnea Syndromes] explode all trees                                                                                                              | 2795    |
| #3  | (SDB):ti,ab,kw OR (OSA):ti,ab,kw OR (OSAS):ti,ab,kw OR (SAHS):ti,ab,kw OR (SAS):ti,ab,kw                                                                                | 7795    |
| #4  | (OSAHS):ti,ab,kw OR (obstructive sleep apnea):ti,ab,kw OR (sleep disorder breathing):ti,ab,kw OR (obstructive sleep apnoea):ti,ab,kw OR (sleep apnea syndrome):ti,ab,kw | 6553    |
| #5  | (sleep apnoea syndrome):ti,ab,kw                                                                                                                                        | 2116    |
| #6  | #1 or #2 or #3 or #4 or #5                                                                                                                                              | 10876   |
| #7  | MeSH descriptor: [Continuous Positive Airway Pressure] explode all trees                                                                                                | 1173    |
| #8  | MeSH descriptor: [Positive-Pressure Respiration] explode all trees                                                                                                      | 2871    |
| #9  | MeSH descriptor: [Noninvasive Ventilation] explode all trees                                                                                                            | 295     |
| #10 | (PAP):ti,ab,kw OR (positive airway pressure):ti,ab,kw OR (CPAP):ti,ab,kw OR (continuous positive airway pressure):ti,ab,kw OR (NPPV):ti,ab,kw                           | 9999    |
| #11 | (positive pressure ventilation):ti,ab,kw OR (positive pressure respiration):ti,ab,kw                                                                                    | 5927    |
| #12 | #7 or #8 or #9 or #10 or #11                                                                                                                                            | 12740   |
| #13 | (randomized control trial):pt OR (controlled clinical trial):pt OR (randomized):ti,ab,kw OR (placebo):ti,ab,kw OR (randomly):ti,ab,kw                                   | 1283486 |
| #14 | #6 and #12 and #13 Custom year range: 01/01/1900 to 01/07/2021                                                                                                          | 2687    |

**Table S2. List of 14 included studies**

- [1] Robinson G V, Pepperell J C T, Segal H C, et al. Circulating cardiovascular risk factors in obstructive sleep apnoea: Data from randomised controlled trials[J]. *Thorax*,2004,59(9):777-782.
- [2] Drager L F, Bortolotto L A, Figueiredo A C, et al. Effects of continuous positive airway pressure on early signs of atherosclerosis in obstructive sleep apnea[J]. *Am. J. Respir. Crit. Care Med.*,2007,176(7):706-712.
- [3] Nguyen P K, Katikireddy C K, Mcconnell M V, et al. Nasal continuous positive airway pressure improves myocardial perfusion reserve and endothelial-dependent vasodilation in patients with obstructive sleep apnea.[J]. *J Cardiovasc Magn Reson*,2010,12:50.
- [4] Craig S E, Kohler M, Nicoll D, et al. Continuous positive airway pressure improves sleepiness but not calculated vascular risk in patients with minimally symptomatic obstructive sleep apnoea: The MOSAIC randomised controlled trial[J]. *Thorax*,2012,67(12):1090-1096.
- [5] Pedrosa R P, Drager L F, De Paula L K G, et al. Effects of OSA treatment on BP in patients with resistant hypertension: A randomized trial[J]. *Chest*,2013,144(5):1487-1494.
- [6] Mcmillan A, Bratton D J, Faria R, et al. A multicentre randomised controlled trial and economic evaluation of continuous positive airway pressure for the treatment of obstructive sleep apnoea syndrome in older people: PREDICT[J]. *Health Technol Assess*,2015,19(40):1-188.
- [7] Feres M C, Fonseca F A H, Cintra F D, et al. An assessment of oxidized LDL in the lipid profiles of patients with obstructive sleep apnea and its association with both hypertension and dyslipidemia, and the impact of treatment with CPAP[J]. *Atherosclerosis*,2015,241(2):342-349.
- [8] Salord N, Fortuna A M, Monasterio C, et al. A randomized controlled trial of continuous positive airway pressure on glucose tolerance in obese patients with obstructive sleep apnea[J]. *Sleep*,2016,39(1):35-41.
- [9] Huang Z, Liu Z, Zhao Z, et al. Effects of Continuous Positive Airway Pressure

on Lipidaemia and High-sensitivity C-reactive Protein Levels in Non-obese Patients with Coronary Artery Disease and Obstructive Sleep Apnoea[J]. *Heart Lung Circul.*,2016,25(6):576-583.

[10] Martinez-Ceron E, Barquiel B, Bezos A M, et al. Effect of Continuous Positive Airway Pressure on Glycemic Control in Patients with Obstructive Sleep Apnea and Type 2 Diabetes. A Randomized Clinical Trial[J]. *Am J Respir Crit Care Med*,2016,194(4):476-485.

[11] Lam J C M, Lai A Y K, Tam T C C, et al. CPAP therapy for patients with sleep apnea and type 2 diabetes mellitus improves control of blood pressure[J]. *Sleep Breathing*,2017,21(2):377-386.

[12] Campos-Rodriguez F, Gonzalez-Martinez M, Sanchez-Armengol A, et al. Effect of continuous positive airway pressure on blood pressure and metabolic profile in women with sleep apnoea[J]. *Eur. Respir. J.*,2017,50(2).

[13] E Silva LO, Guimarães TM, Pontes G, Coelho G, Badke L, Fabbro CD, Tufik S, Bittencourt L, Togeiro S. The effects of continuous positive airway pressure and mandibular advancement therapy on metabolic outcomes of patients with mild obstructive sleep apnea: a randomized controlled study. *Sleep Breath.* 2021 Jun;25(2):797-805. doi: 10.1007/s11325-020-02183-1. Epub 2021 Jan 4.

[14] Celik, Y.; Balcan, B.; Peker, Y. CPAP Intervention as an Add-On Treatment to Lipid-Lowering Medication in Coronary Artery Disease Patients with Obstructive Sleep Apnea in the RICCADSA Trial. *J. Clin. Med.* 2022;11(1):273. Published 2022 Jan 5. doi:10.3390/jcm11010273



**Table S3. Quality and risk of bias**

|      | Study (first author, year) | Random sequence generation | Allocation concealment | Blinding | Incomplete outcome data | Selective reporting |
|------|----------------------------|----------------------------|------------------------|----------|-------------------------|---------------------|
| [1]  | Robinson, 2004             | Unclear                    | Unclear                | Low      | Unclear                 | Low                 |
| [2]  | Drager, 2007               | Low                        | Unclear                | Low      | Low                     | Low                 |
| [3]  | Nguyen, 2010               | Unclear                    | Unclear                | Low      | Low                     | Unclear             |
| [4]  | Craig, 2012                | Low                        | Low                    | Low      | Low                     | Low                 |
| [5]  | Pedrosa, 2013              | Low                        | Unclear                | Low      | Low                     | Low                 |
| [6]  | McMillan, 2015             | Low                        | Low                    | Low      | Low                     | Low                 |
| [7]  | Feres, 2015                | Unclear                    | Unclear                | Low      | High                    | Unclear             |
| [8]  | Salord, 2016               | Low                        | Low                    | Low      | High                    | Low                 |
| [9]  | Huang, 2016                | Low                        | Low                    | Low      | High                    | Low                 |
| [10] | Lam, 2017                  | Low                        | Low                    | Low      | Low                     | Low                 |
| [11] | Rodriguez, 2017            | Low                        | Low                    | Low      | Low                     | Low                 |
| [12] | Pascual, 2018              | Low                        | Low                    | Low      | Low                     | Low                 |
| [13] | Silva, 2020                | Unclear                    | Unclear                | Unclear  | Low                     | Unclear             |
| [14] | Celik, 2022                | Unclear                    | Unclear                | Low      | Low                     | Low                 |

The quality and risk of bias of studies were assessed by using Cochrane Collaboration tool.

**Table S4 Comparison of total cholesterol before and after trim and fill**

| Before trim and fill |          |                              | After trim and fill |          |                              |          |
|----------------------|----------|------------------------------|---------------------|----------|------------------------------|----------|
|                      | <i>n</i> | <i>WMD</i> (95% <i>CI</i> )  | <i>P</i>            | <i>n</i> | <i>WMD</i> (95% <i>CI</i> )  | <i>P</i> |
| TC, mmol/l           | 11       | -0.098<br>(-0.169 to -0.027) | 0.007               | 12       | -0.091<br>(-0.161 to -0.020) | 0.012    |

TC=total cholesterol, WMD=weighted mean difference

**Table S5-1. Sensitivity analyses of total cholesterol**

| Study omitted   | Estimate    | [95% Conf.  | Interval]   |
|-----------------|-------------|-------------|-------------|
| Robinson, 2004  | -0.08301325 | -0.15886132 | -0.00716517 |
| Drager, 2007    | -0.09626774 | -0.16866001 | -0.02387546 |
| Craig, 2012     | -0.09754509 | -0.17414299 | -0.02094721 |
| Pedrosa, 2013   | -0.09924889 | -0.17064057 | -0.02785721 |
| McMillan, 2015  | -0.09756524 | -0.17384826 | -0.02128222 |
| Feres, 2015     | -0.09106418 | -0.16694887 | -0.01517950 |
| Huang, 2016     | -0.10347956 | -0.17657942 | -0.03037971 |
| Lam, 2017       | -0.09491885 | -0.16818346 | -0.02165425 |
| Rodriguez, 2017 | -0.12129453 | -0.20097360 | -0.04161546 |
| Pascual, 2018   | -0.09054761 | -0.16290791 | -0.01818730 |
| Celik, 2022     | -0.10449253 | -0.18120848 | -0.02777657 |
| Combined        | -0.09787463 | -0.16914636 | -0.02660289 |

**Table S5-2. Sensitivity analyses of triglyceride**

| Study omitted   | Estimate   | [95% Conf.  | Interval]  |
|-----------------|------------|-------------|------------|
| Robinson, 2004  | 0.08919748 | -0.04598834 | 0.22438329 |
| Drager, 2007    | 0.06519557 | -0.07219718 | 0.20258832 |
| Nguyen, 2010    | 0.07556043 | -0.05831041 | 0.20943126 |
| Craig, 2012     | 0.08549876 | -0.05914781 | 0.23014532 |
| Pedrosa, 2013   | 0.06170956 | -0.07491008 | 0.19832920 |
| McMillan, 2015  | 0.07826278 | -0.06771462 | 0.22424018 |
| Feres, 2015     | 0.04242621 | -0.07081598 | 0.15566841 |
| Salord, 2016    | 0.03595541 | -0.09342412 | 0.16533493 |
| Huang, 2016     | 0.08407970 | -0.05584837 | 0.22400777 |
| Lam, 2017       | 0.09736572 | -0.03761051 | 0.23234196 |
| Rodriguez, 2017 | 0.08407024 | -0.06234865 | 0.23048912 |
| Pascual, 2018   | 0.08005958 | -0.05325329 | 0.21337244 |
| Silva, 2020     | 0.08562919 | -0.04548026 | 0.21673864 |
| Celik, 2022     | 0.06952607 | -0.07072233 | 0.20977446 |
| Combined        | 0.07430991 | -0.05731284 | 0.20593266 |

**Table S5-3. Sensitivity analyses of high-density lipoprotein**

| Study omitted   | Estimate    | [95% Conf.  | Interval]  |
|-----------------|-------------|-------------|------------|
| Drager, 2007    | -0.03215907 | -0.11349689 | 0.04917875 |
| Nguyen, 2010    | -0.02932063 | -0.10764298 | 0.04900172 |
| Craig, 2012     | -0.03273138 | -0.11848632 | 0.05302357 |
| Pedrosa, 2013   | -0.02743054 | -0.10603452 | 0.05117344 |
| McMillan, 2015  | -0.03710326 | -0.11910234 | 0.04489582 |
| Feres, 2015     | -0.00118933 | -0.02302800 | 0.02064935 |
| Salord, 2016    | -0.03445792 | -0.11395063 | 0.04503480 |
| Huang, 2016     | -0.03642977 | -0.11331961 | 0.04046007 |
| Lam, 2017       | -0.03493189 | -0.11676038 | 0.04689660 |
| Rodriguez, 2017 | -0.03239853 | -0.11484747 | 0.05005040 |
| Pascual, 2018   | -0.03894426 | -0.11882939 | 0.04094087 |
| Silva, 2020     | -0.03248797 | -0.11056865 | 0.04559271 |
| Celik, 2022     | -0.03671269 | -0.11880156 | 0.04537619 |
| Combined        | -0.03192984 | -0.10760501 | 0.04374534 |

**Table S5-4. Sensitivity analyses of low-density lipoprotein**

| Study omitted   | Estimate    | [95% Conf.  | Interval]  |
|-----------------|-------------|-------------|------------|
| Drager, 2007    | -0.06090186 | -0.18706910 | 0.06526539 |
| Nguyen, 2010    | -0.08444256 | -0.20673917 | 0.03785406 |
| Craig, 2012     | -0.07114834 | -0.20602511 | 0.06372842 |
| Pedrosa, 2013   | -0.06375055 | -0.18742712 | 0.05992602 |
| McMillan, 2015  | -0.05738017 | -0.19966134 | 0.08490100 |
| Feres, 2015     | -0.03700811 | -0.07988618 | 0.00586996 |
| Huang, 2016     | -0.07829013 | -0.20403281 | 0.04745254 |
| Lam, 2017       | -0.06920213 | -0.19578452 | 0.05738028 |
| Rodriguez, 2017 | -0.08224992 | -0.20926459 | 0.04476476 |
| Pascual, 2018   | -0.05821997 | -0.18372943 | 0.06728949 |
| Silva, 2020     | -0.05445078 | -0.17658950 | 0.06768794 |
| Celik, 2022     | -0.06550074 | -0.20676067 | 0.07575919 |
| Combined        | -0.06434616 | -0.18514938 | 0.05645705 |

**Table S6. Meta-regression analyses for lipid profiles**

| Independent variable        | Outcome ( <i>coefficient, P-value</i> ) |               |               |               |
|-----------------------------|-----------------------------------------|---------------|---------------|---------------|
|                             | $\Delta$ TC                             | $\Delta$ TG   | $\Delta$ HDL  | $\Delta$ LDL  |
| Age, year                   | 0.006, 0.339                            | -0.009, 0.347 | 0.003, 0.439  | 0.004, 0.567  |
| Male percentage, %          | -0.002, 0.186                           | -0.001, 0.441 | 0.000, 0.445  | -0.001, 0.205 |
| BMI, kg/m <sup>2</sup>      | -0.008, 0.503                           | 0.016, 0.146  | 0.002, 0.712  | -0.005, 0.810 |
| Obesity                     | -0.055, 0.543                           | 0.059, 0.708  | -0.034, 0.594 | -0.100, 0.408 |
| ESS, point                  | -0.013, 0.319                           | -0.015, 0.576 | -0.001, 0.854 | -0.006, 0.568 |
| AHI, event/hour             | -0.003, 0.328                           | 0.008, 0.057  | 0.000, 0.970  | -0.003, 0.549 |
| Follow-up duration, week    | 0.002, 0.493                            | -0.002, 0.728 | 0.000, 0.710  | -0.002, 0.672 |
| CPAP compliance, hour/night | -0.003, 0.921                           | 0.067, 0.135  | -0.005, 0.567 | 0.032, 0.199  |
| Cardiometabolic disease     | 0.052, 0.553                            | -0.079, 0.594 | 0.041, 0.542  | 0.093, 0.451  |

AHI=apnea-hypopnea index; CPAP=continuous positive airway pressure; ESS=Epworth Sleepiness Scale; HDL=high-density lipoprotein,

LDL=low-density lipoprotein, TC=total cholesterol, TG=triglyceride, WMD=weighted mean difference

We meta-regressed one variable at a time. Each  $\Delta$ lipid profile was calculated as the endpoint minus baseline values.

Cardiometabolic disease was defined as resistant hypertension, coronary artery disease, or diabetes. Obesity was defined based on the studies in which mean BMI  $\geq 30$  kg/m<sup>2</sup>.
